# Supplementary material
Source: publisher figshare collection journal article supplement (https://acs.figshare.com/ndownloader/files/3935695)

## SUPPORTING INFORMATION

### Tryptamine-based derivatives as Transient Receptor Potential Melastatin type-8 (TRPM8) channels modulators

Alessia Bertamino<sup>a,§</sup>, Carmine Ostacolo<sup>b,§</sup>, Paolo Ambrosino<sup>c,§</sup>, Simona Musella<sup>b</sup>, Veronica Di Sarno<sup>a</sup>, Tania Ciaglia<sup>a</sup>, Maria Virginia Soldovieri<sup>c</sup>, Nunzio Iraci<sup>a</sup>, Asia Fernandez Carvajal<sup>d</sup>, Roberto de la Torre-Martinez<sup>d</sup>, Antonio Ferrer-Montiel<sup>d</sup>, Rosario Gonzalez Muniz<sup>e</sup>, Ettore Novellino<sup>b</sup>, Maurizio Taglialatela<sup>c</sup>, Pietro Campiglia<sup>a\*</sup>, Isabel Gomez Monterrey<sup>b\*</sup>

#### Table of content:

#### 1. Supplementary schemes and figures:

|                                                                                                                         |    |
|-------------------------------------------------------------------------------------------------------------------------|----|
| <b>Scheme S1:</b> Synthesis of intermediates <b>3a</b> and <b>6a</b> .....                                              | S2 |
| <b>Figure S1:</b> Sitemap graphical output for BP1.....                                                                 | S3 |
| <b>Figure S2:</b> Protein-Ligand contacts for <b>21</b> and <b>12</b> .....                                             | S4 |
| <b>Figure S3:</b> Pharmacophore models.....                                                                             | S5 |
| <b>Table S1:</b> Fittings of the tryptamine-based agonists and antagonists on the respective pharmacophore models ..... | S6 |

|                                                                     |               |
|---------------------------------------------------------------------|---------------|
| <b>2. Qualitative HPLC runs for derivatives 4-12 and 14-22.....</b> | <b>S7-S24</b> |
|---------------------------------------------------------------------|---------------|

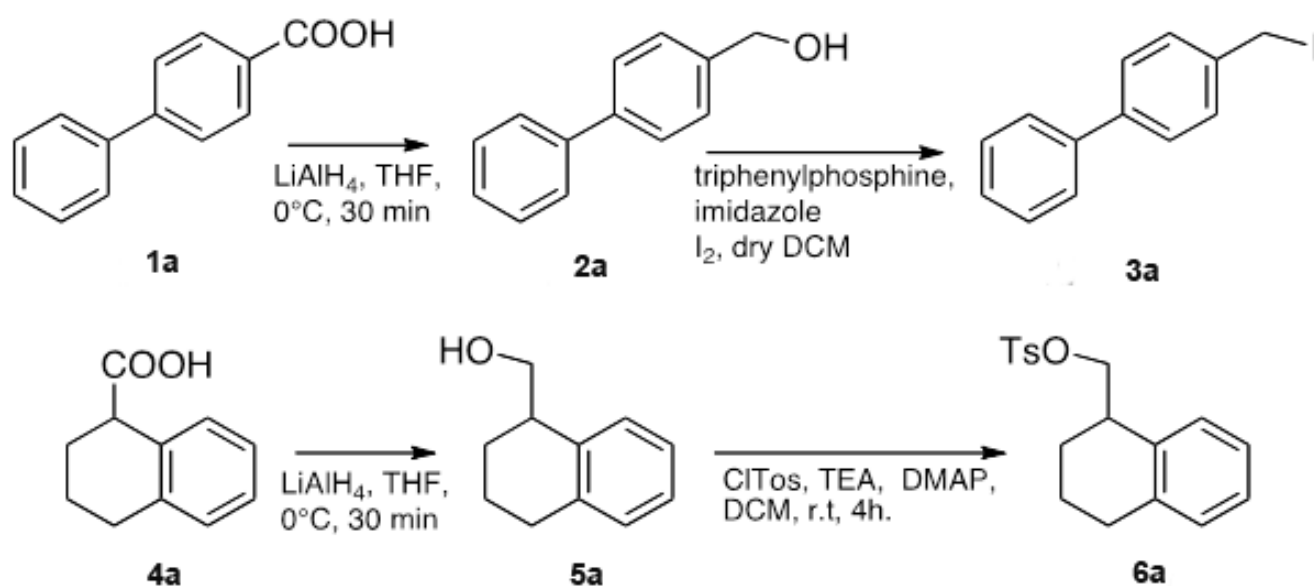

**Scheme S1:** Synthesis of intermediates 4-phenylbenzyl iodide (**3a**) and 1,2,3,4-tetrahydronaphthalen-4-yl)methyl 4-methylbenzenesulfonate (**6a**)

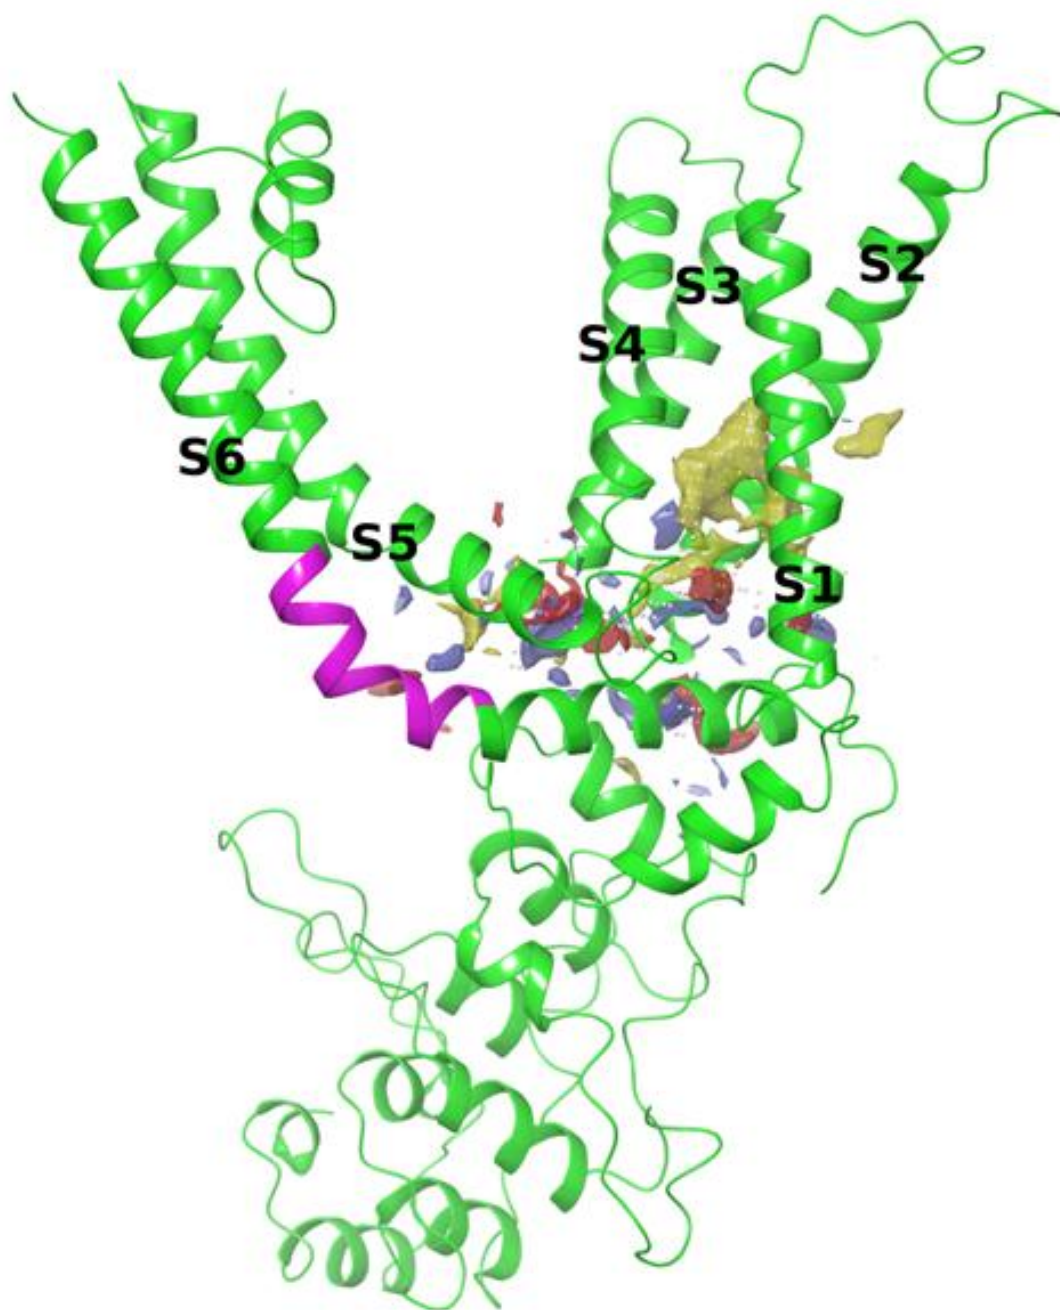

**Figure S1:** Sitemap graphical output for BP1. Hydrophobic surfaces are depicted in yellow, HB donors locations as blue surfaces, HB acceptors locations as red surfaces. The 980-990 region is highlighted in magenta

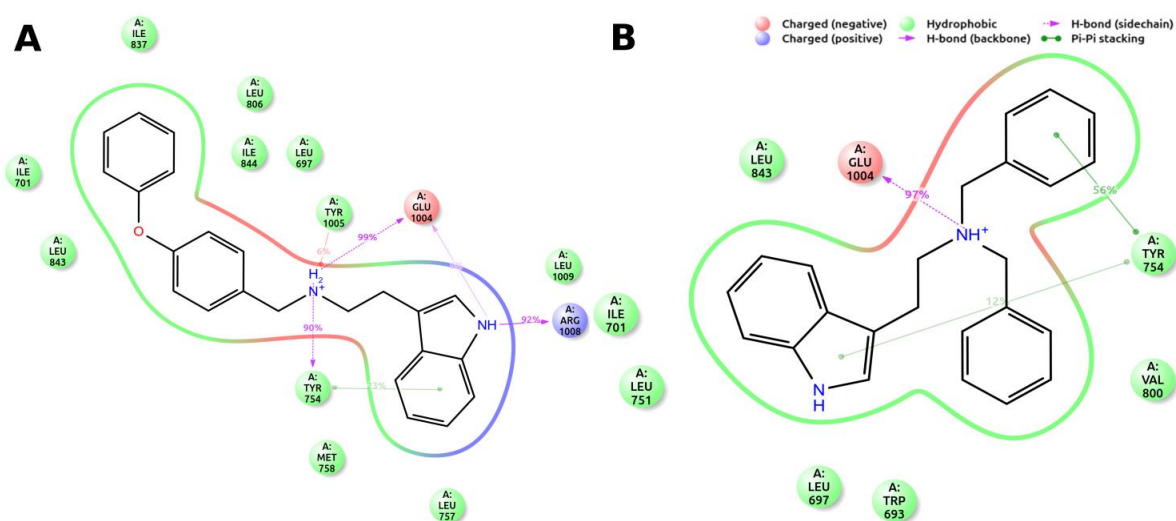

**Figure S2** Protein-Ligand contacts for 21 (panel A) and 12 (panel B), recorded during 12 ns long MD trajectories.

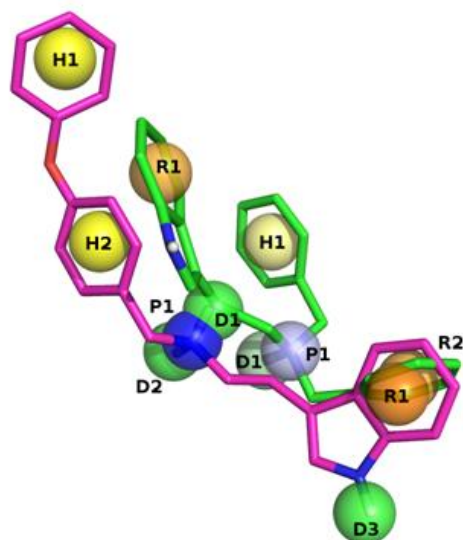

**Figure S3:** Pharmacophore models for tryptamine-based TRPM8 agonists and antagonists. Chemical features are depicted as spheres and color-coded as follows: yellow, H = hydrophobic; blue, P = positive charge; green, D = HB donor; orange, R= aromatic ring. Chemical features of the antagonist model are depicted in paler colors. **21** (magenta sticks) and **12** (green sticks) are represented as references.

# Tryptamine-based derivatives as TRPM8 modulators

| Comp.      | Agonist Model    |                  |                                      |                   |                  |                   |                   | Antagonist Model |                  |                                       |                   |                   |
|------------|------------------|------------------|--------------------------------------|-------------------|------------------|-------------------|-------------------|------------------|------------------|---------------------------------------|-------------------|-------------------|
|            | H1               | H2               | R1                                   | P1                | D1               | D2                | D3                | H1               | R1               | R2                                    | P1                | D1                |
|            | I <sup>701</sup> | I <sup>844</sup> | Y <sup>754</sup><br>M <sup>758</sup> | E <sup>1004</sup> | Y <sup>754</sup> | E <sup>1004</sup> | R <sup>1008</sup> | V <sup>800</sup> | Y <sup>754</sup> | R <sup>1008</sup><br>Y <sup>754</sup> | E <sup>1004</sup> | E <sup>1004</sup> |
| <b>4</b>   | O                | X                | X                                    | X                 | X                | X                 |                   |                  | X                | X                                     | X                 | X                 |
| <b>5</b>   |                  | X                | X                                    | X                 | X                | X                 | \                 |                  | X                | X                                     | X                 | X                 |
| <b>6</b>   | \                | X                | O                                    | X                 | X                | X                 |                   |                  | X                | X                                     | X                 | X                 |
| <b>7</b>   |                  | X                | X                                    | X                 | X                | X                 |                   |                  | O                | O                                     | O                 | O                 |
| <b>12</b>  |                  |                  | X                                    | X                 |                  | X                 | X                 | X                | X                | X                                     | X                 | X                 |
| <b>15</b>  |                  | X                | X                                    | X                 | X                | X                 | X                 |                  | X                | X                                     | X                 | X                 |
| <b>16</b>  |                  | X                | X                                    | X                 | X                | X                 | X                 |                  | X                | O                                     | X                 | X                 |
| <b>18</b>  |                  | X                | X                                    | X                 | X                | X                 | X                 |                  | X                | X                                     | X                 | X                 |
| <b>21</b>  | X                | X                | X                                    | X                 | X                | X                 | X                 |                  | X                | X                                     | X                 | X                 |
| <b>22s</b> | O                |                  | O                                    | X                 | O                |                   |                   | X                |                  | O                                     | X                 | X                 |
| <b>22r</b> | O                |                  | O                                    | X                 |                  | X                 | X                 | X                | X                | X                                     | X                 | X                 |

**Table S1:** Fittings of the tryptamine-based agonists and antagonists on the respective pharmacophore models. (X=good fit, O=partial fit, /=misfit, e.g. polar group on a hydrophobic location)

## 2. Qualitative HPLC runs for derivatives 4-12 and 14- 22

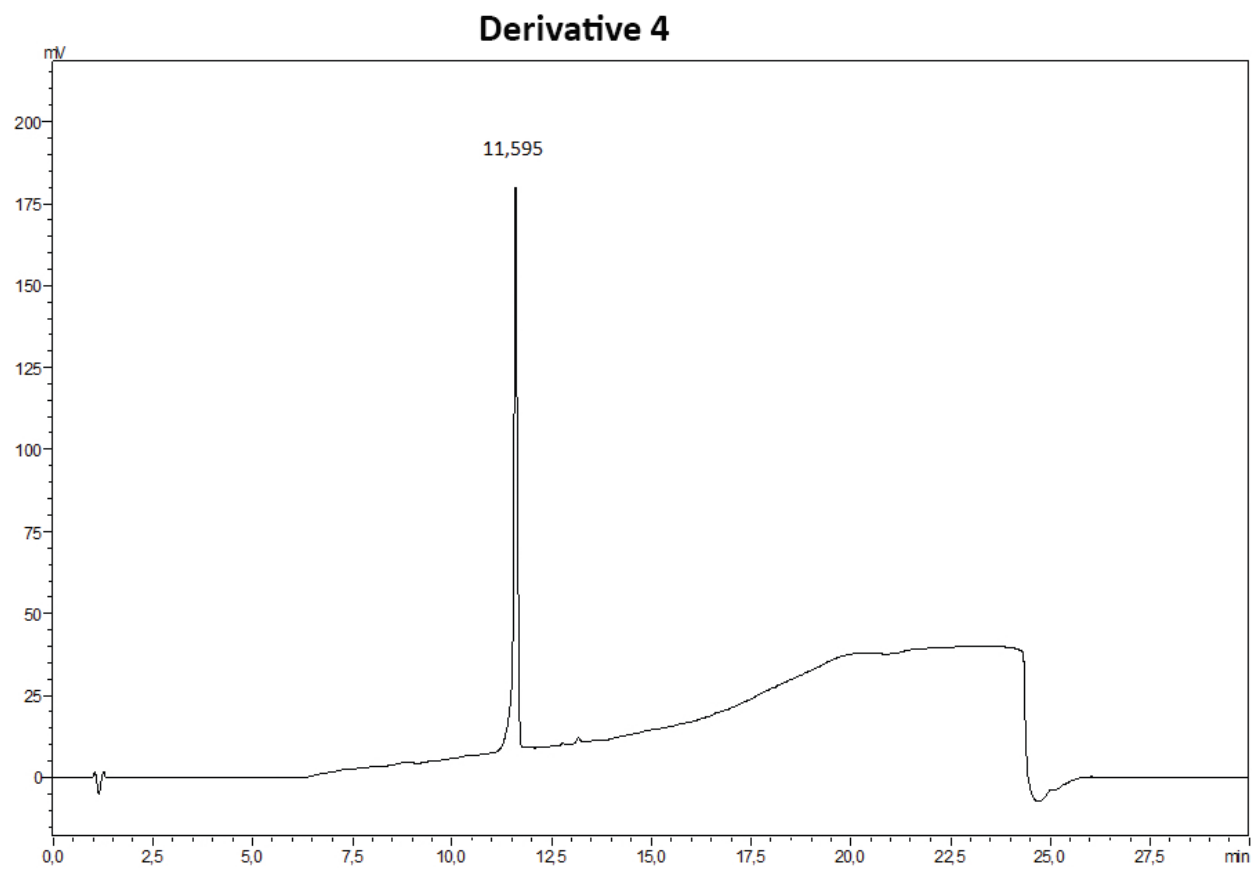

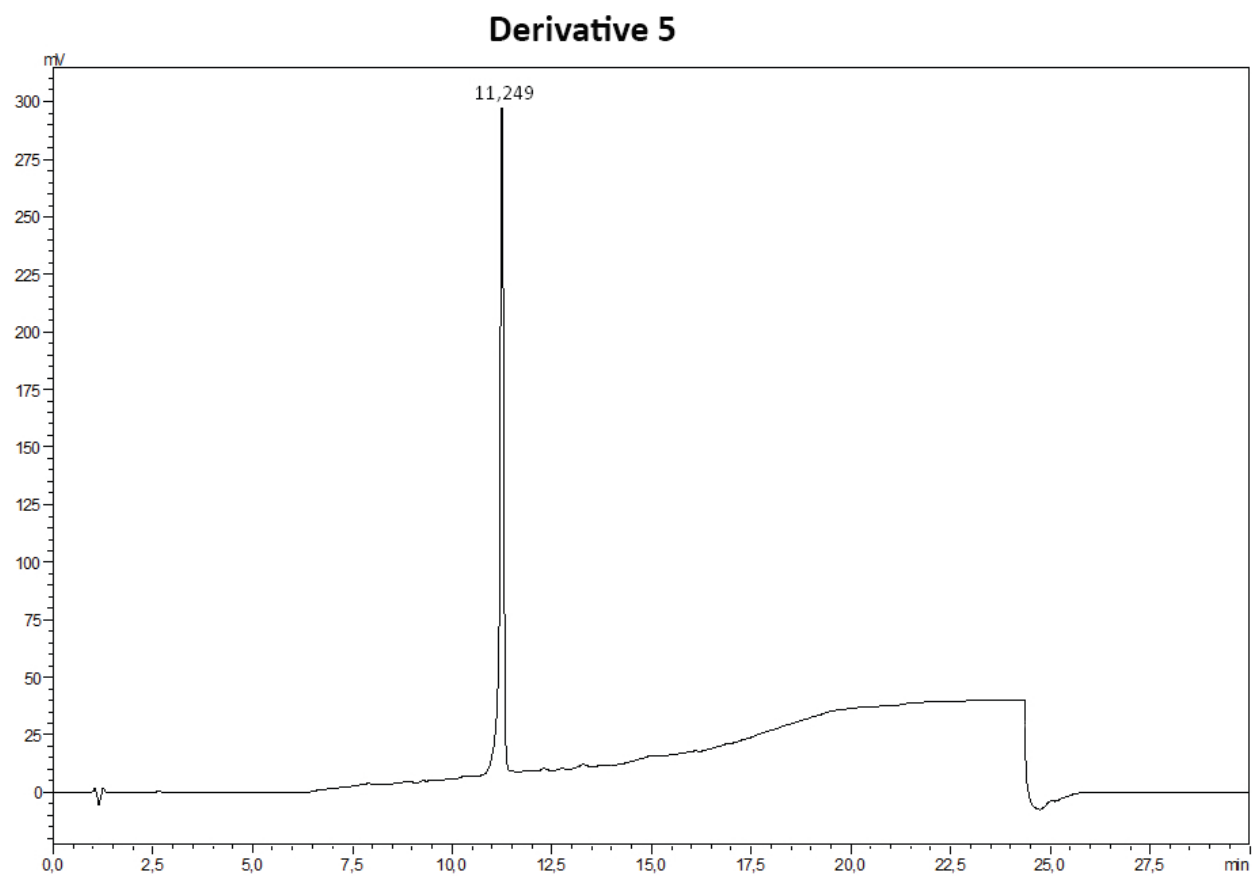



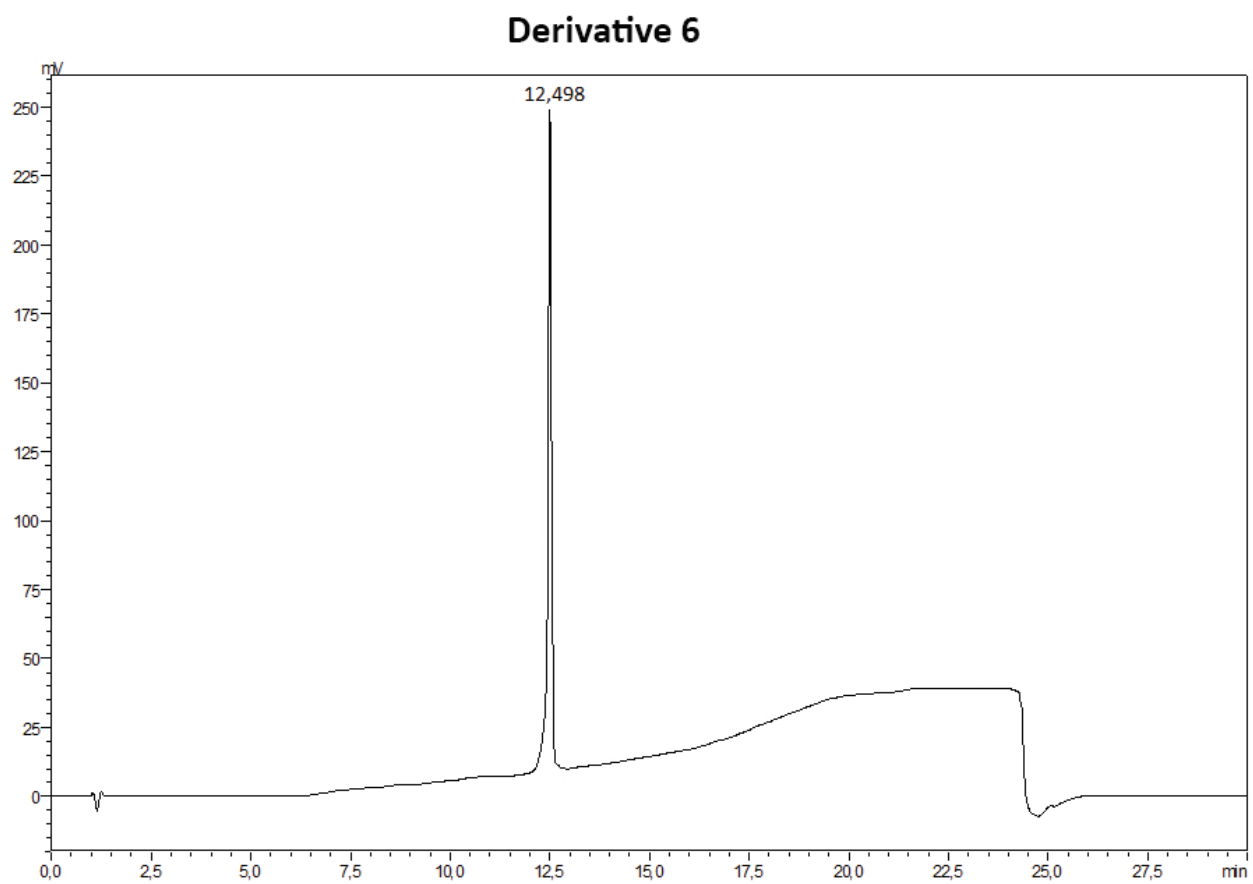

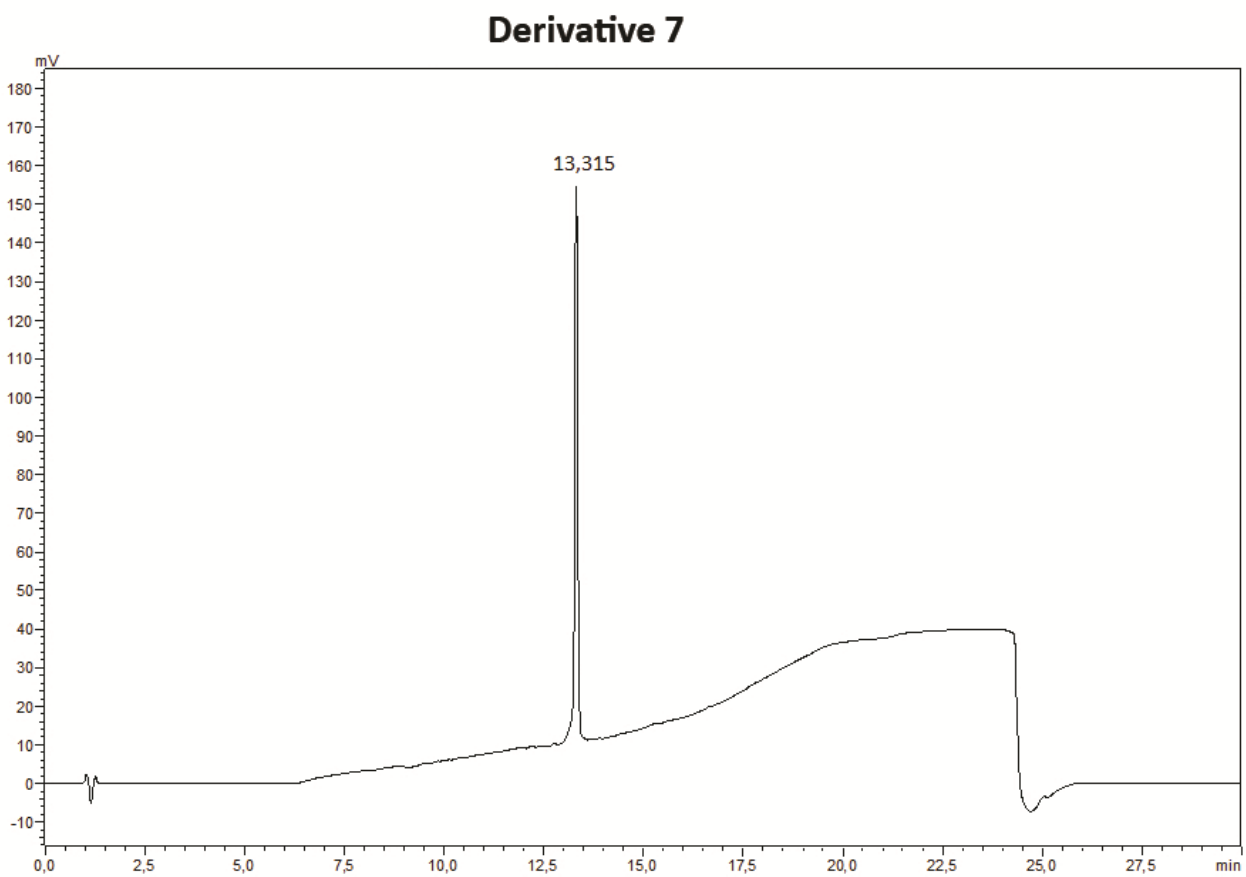

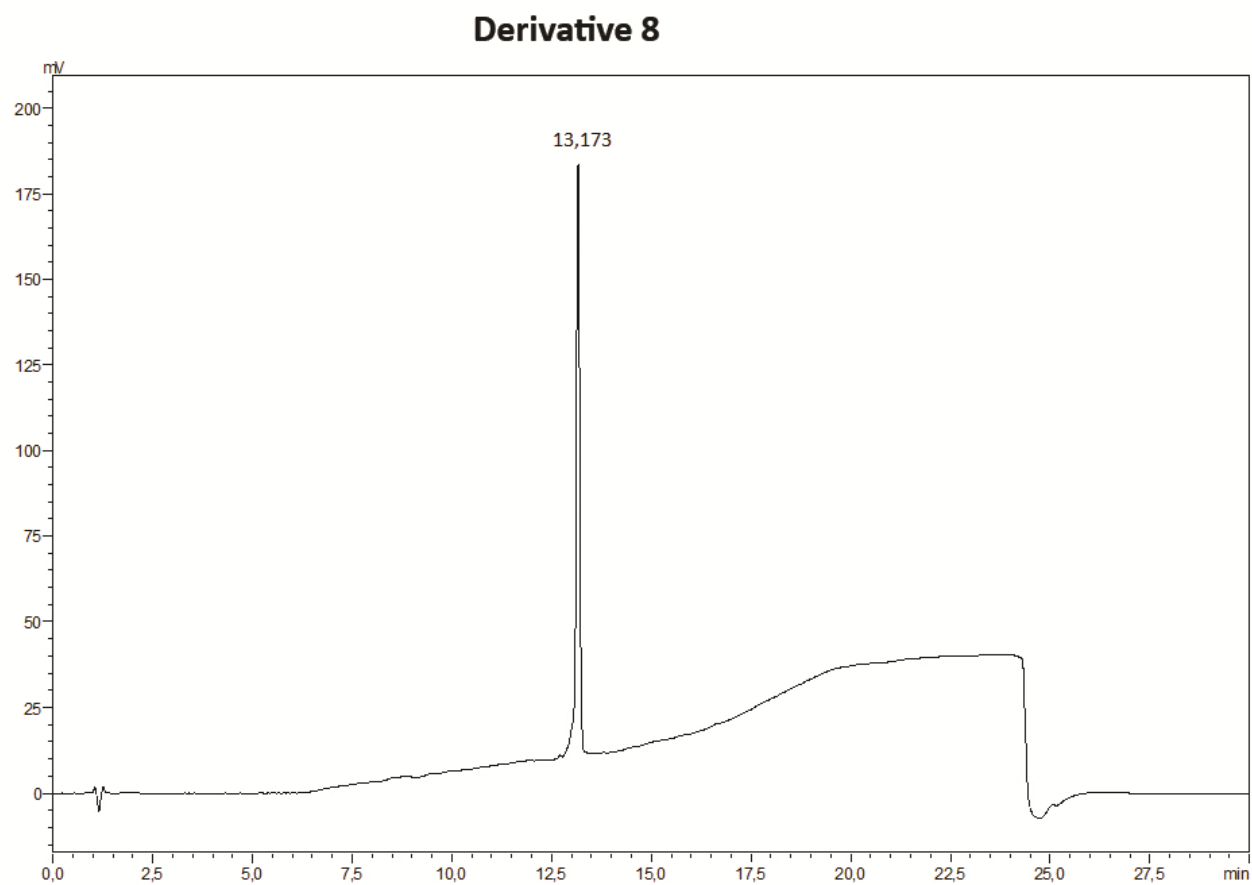

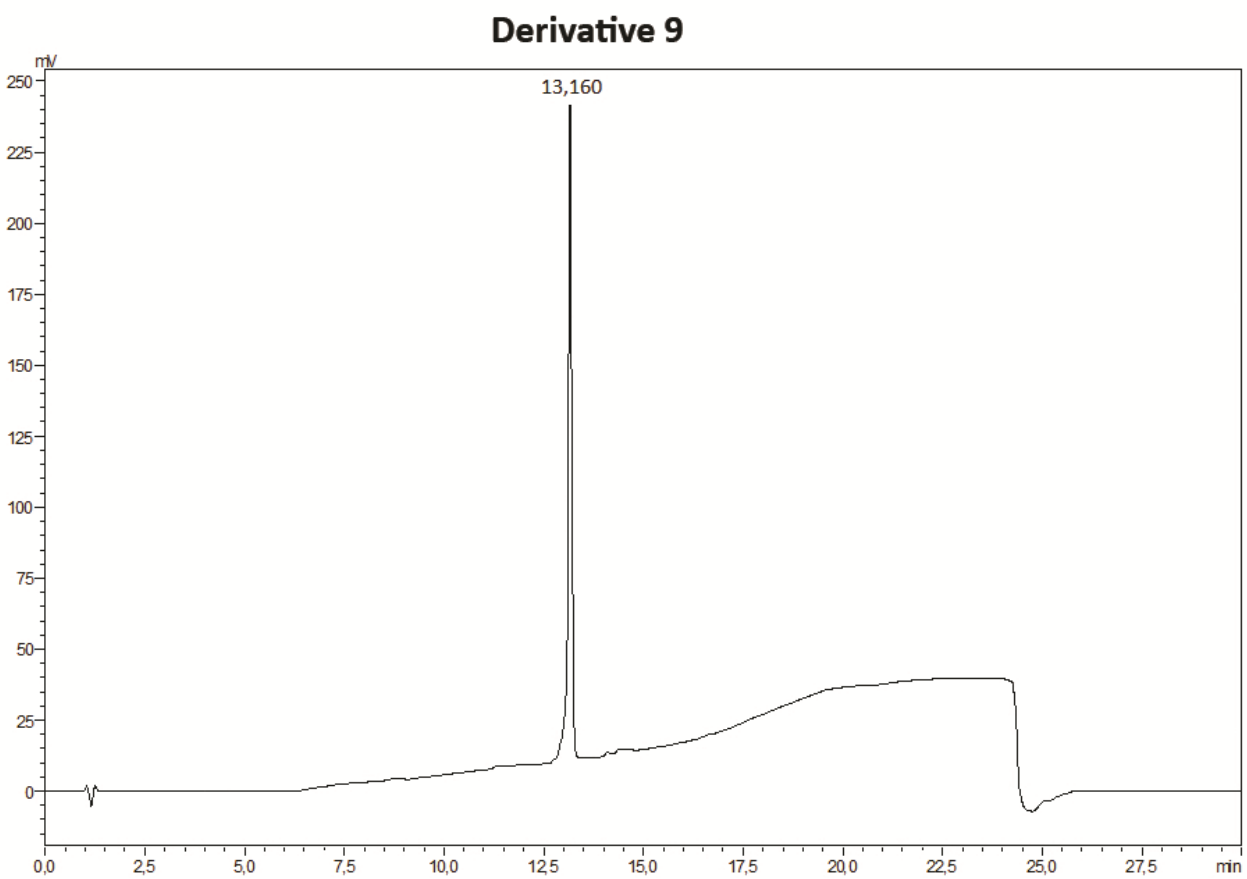

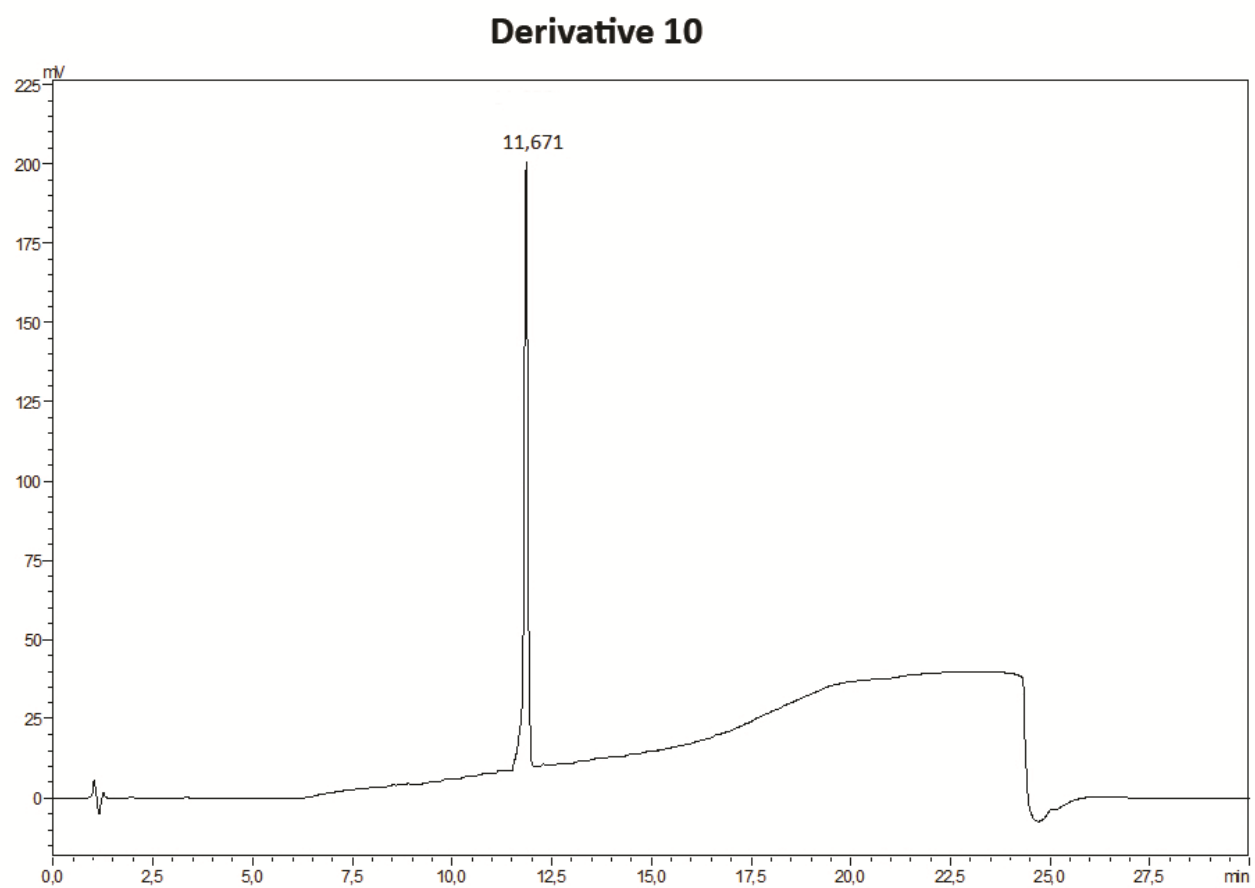

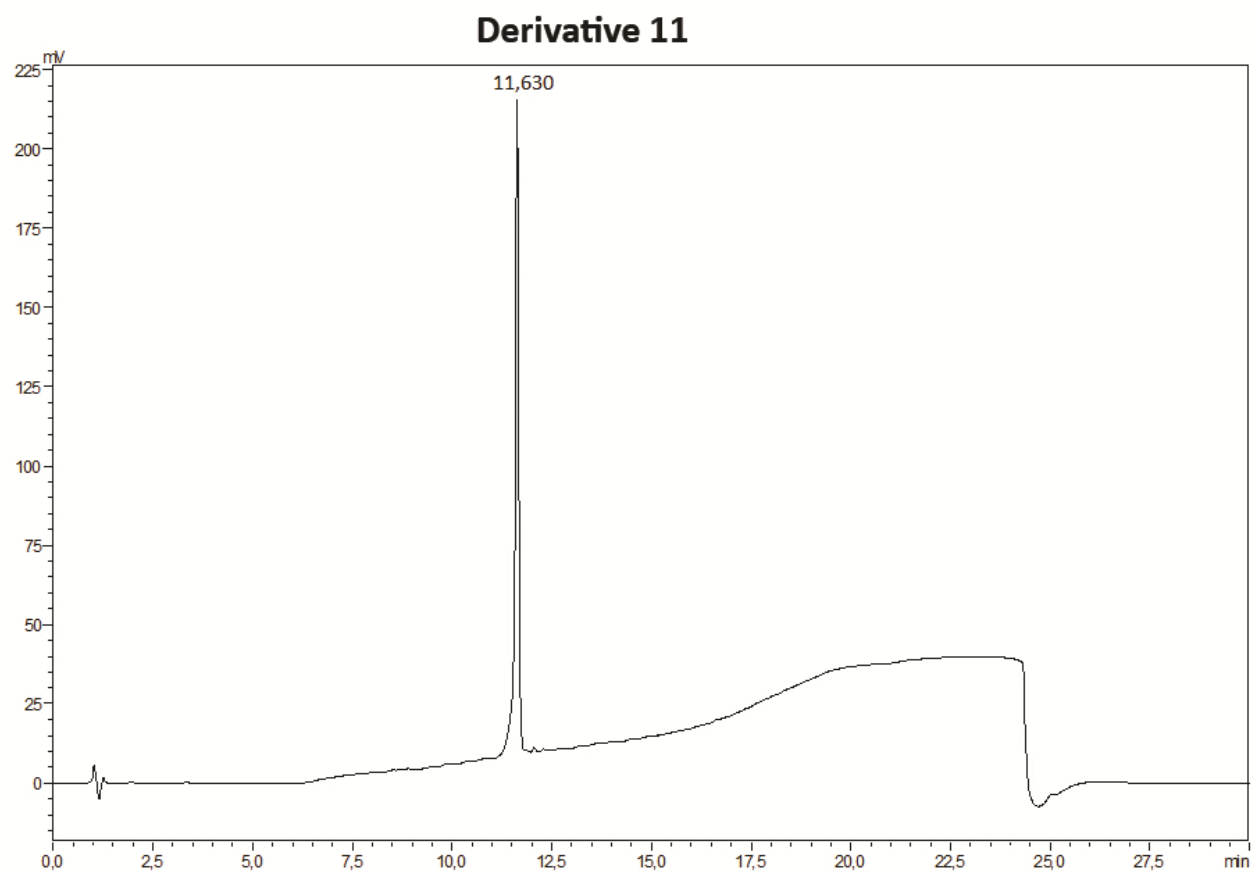

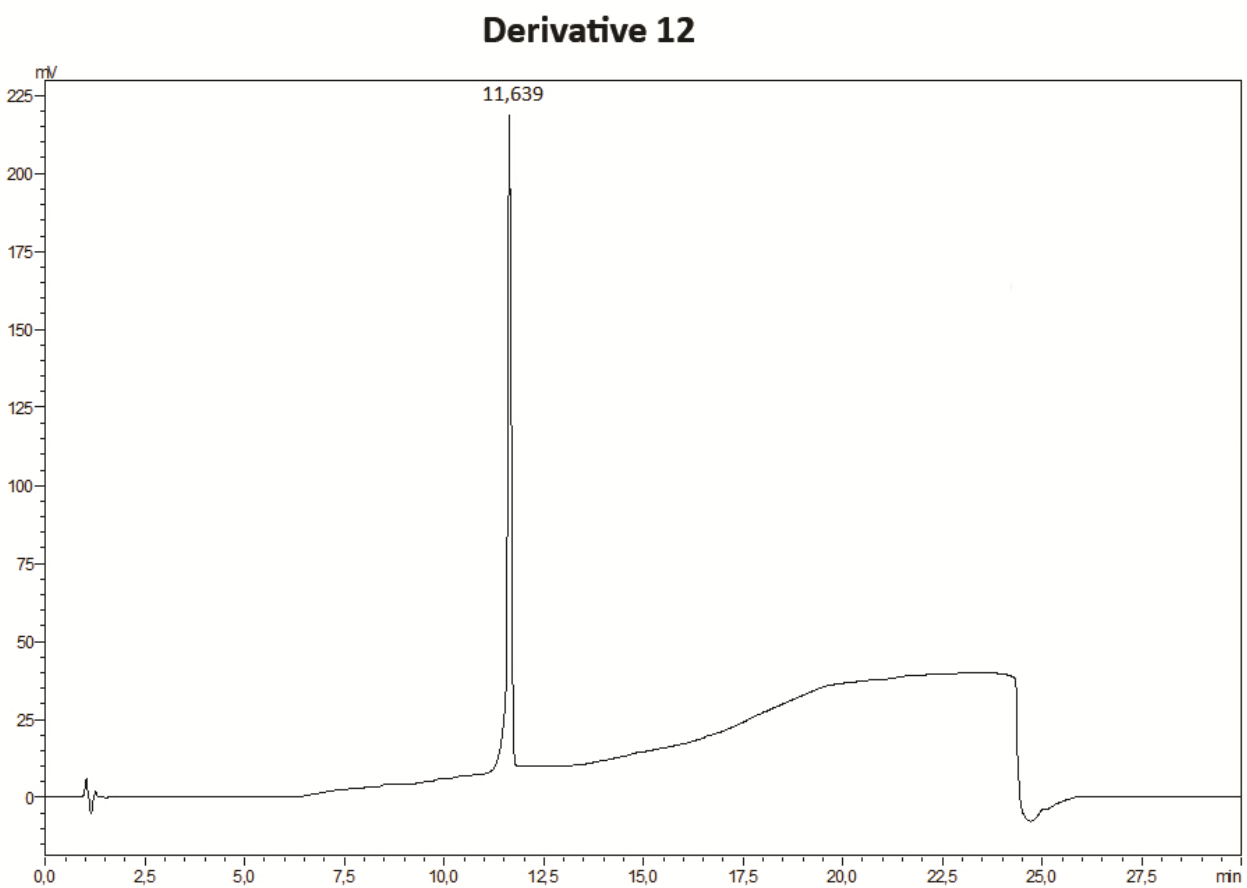

**Derivative 14**

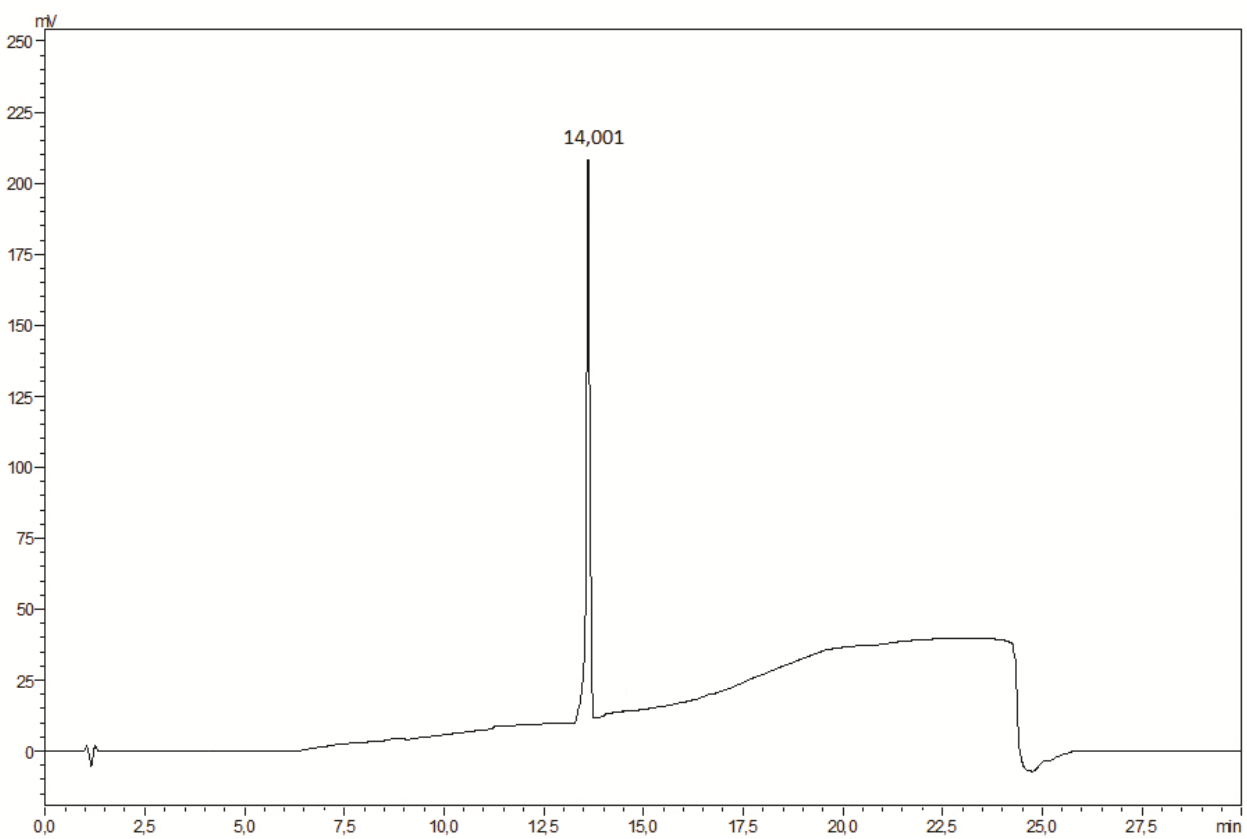



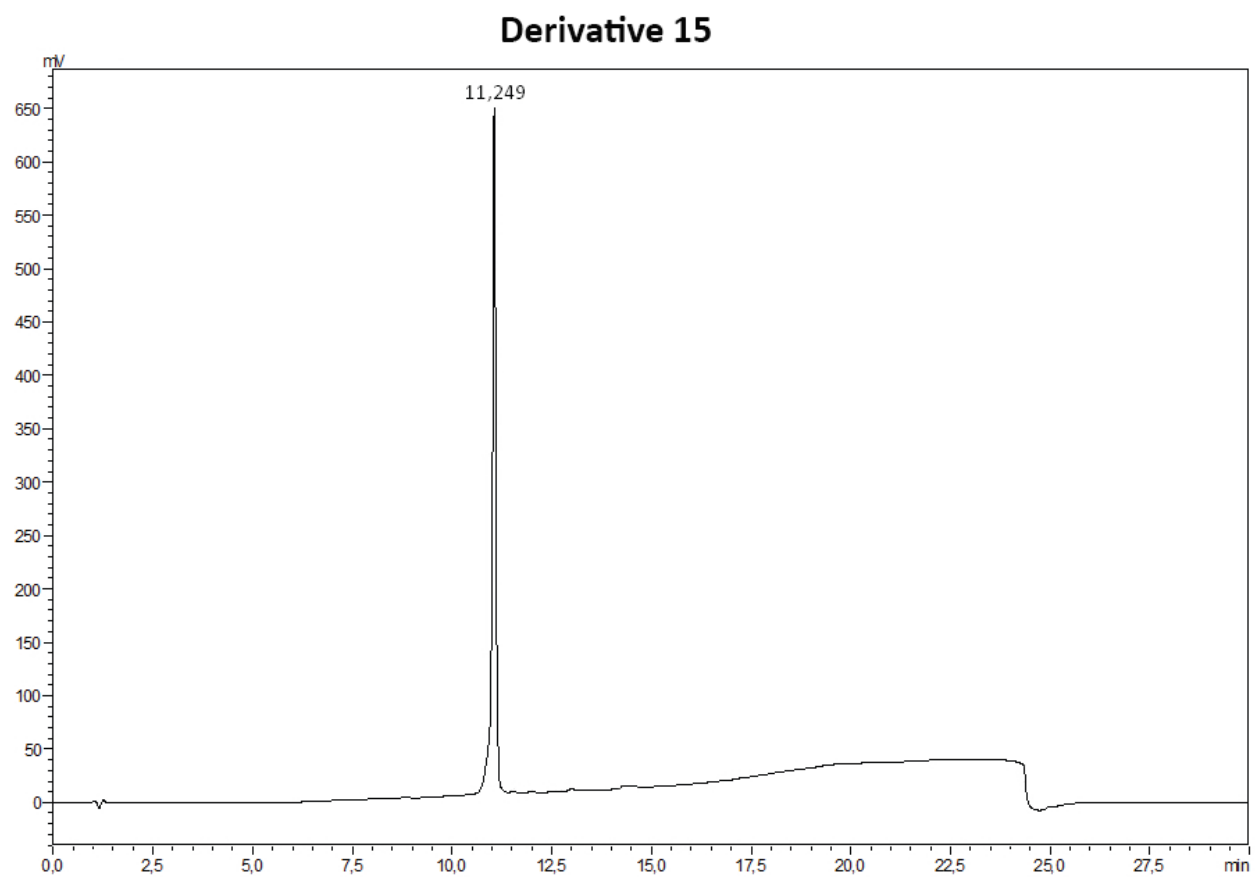

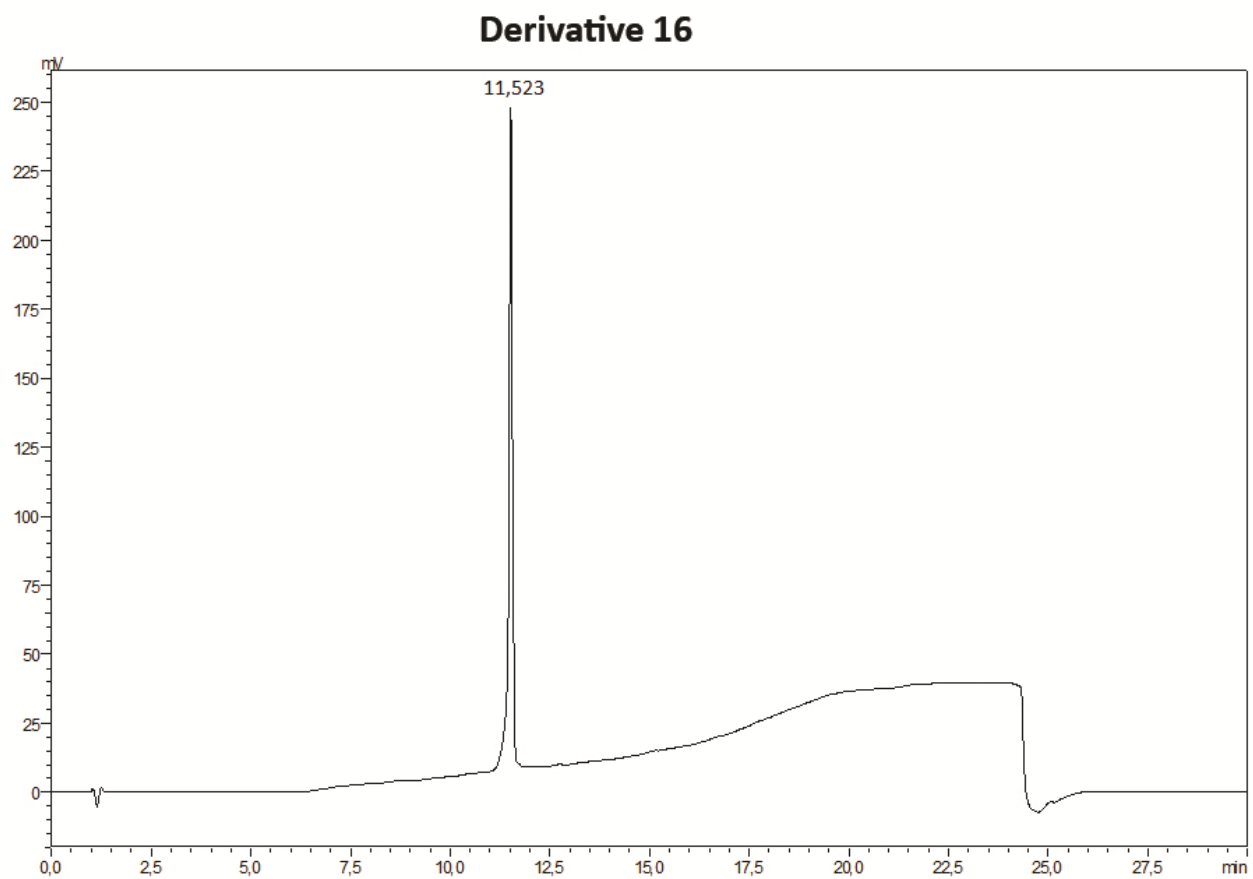

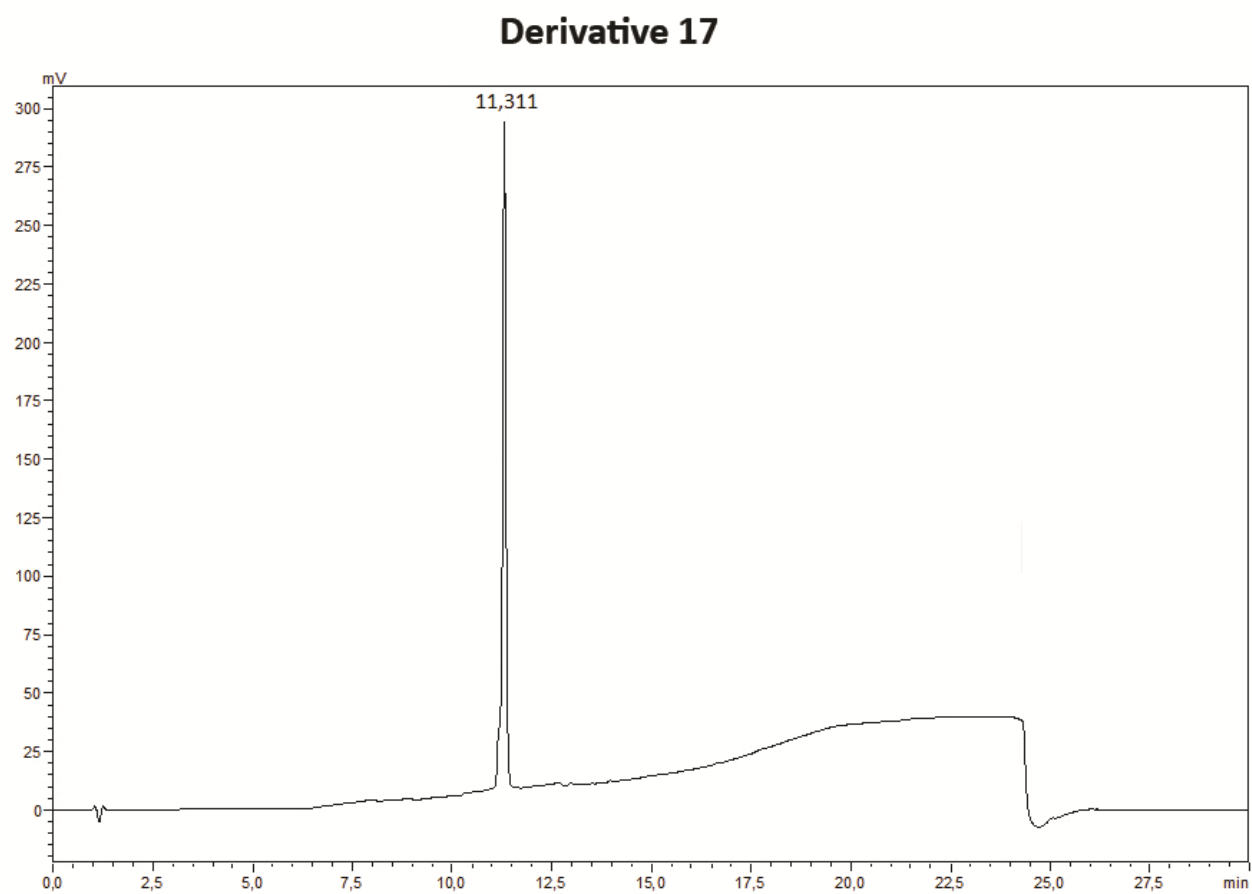

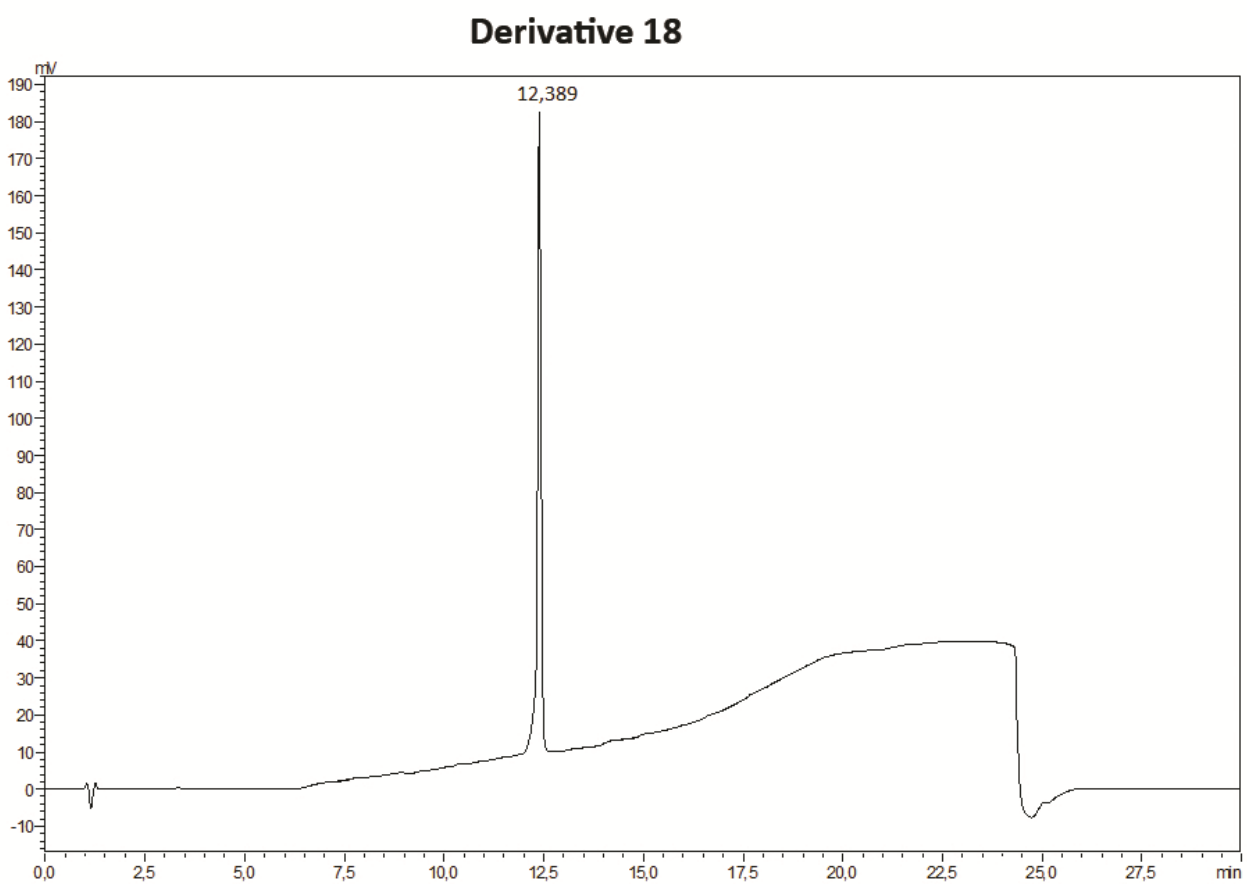

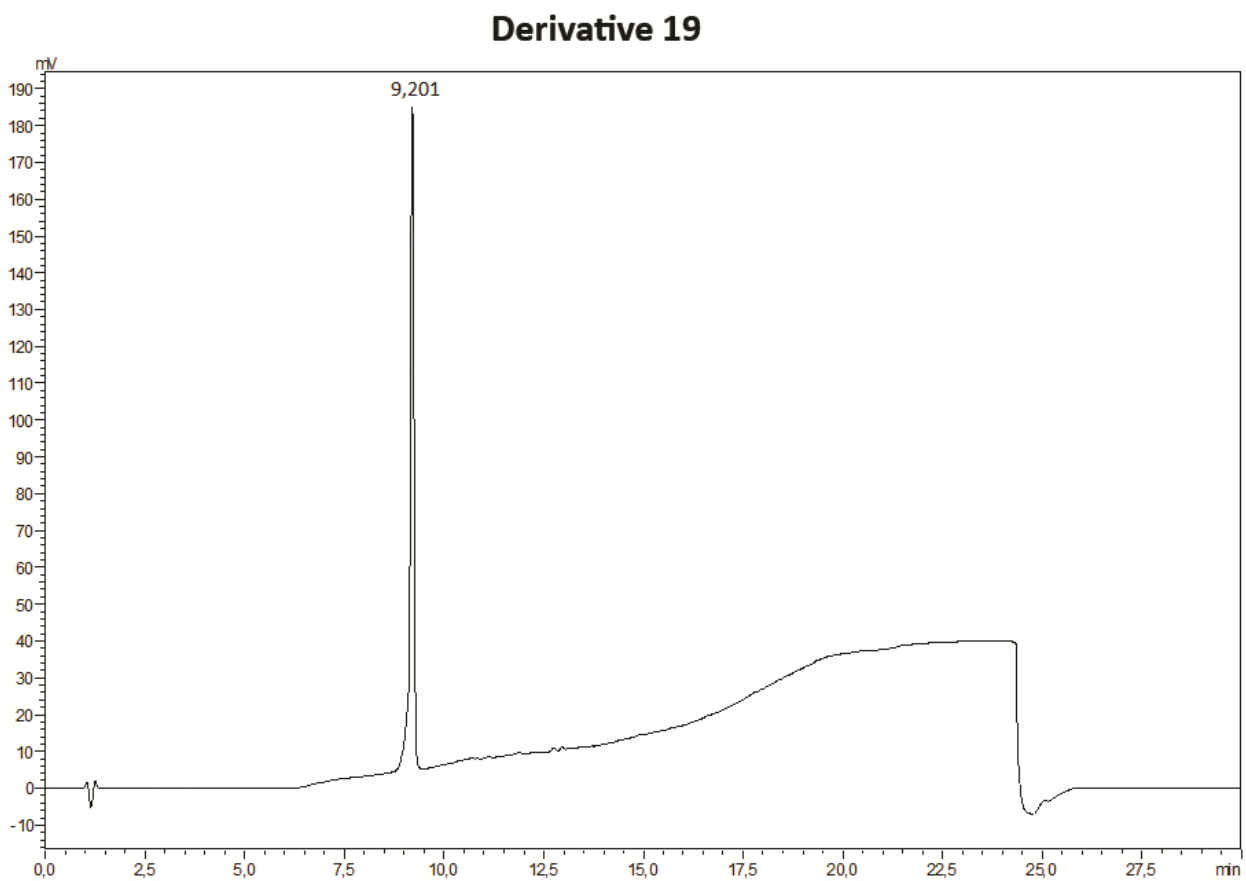

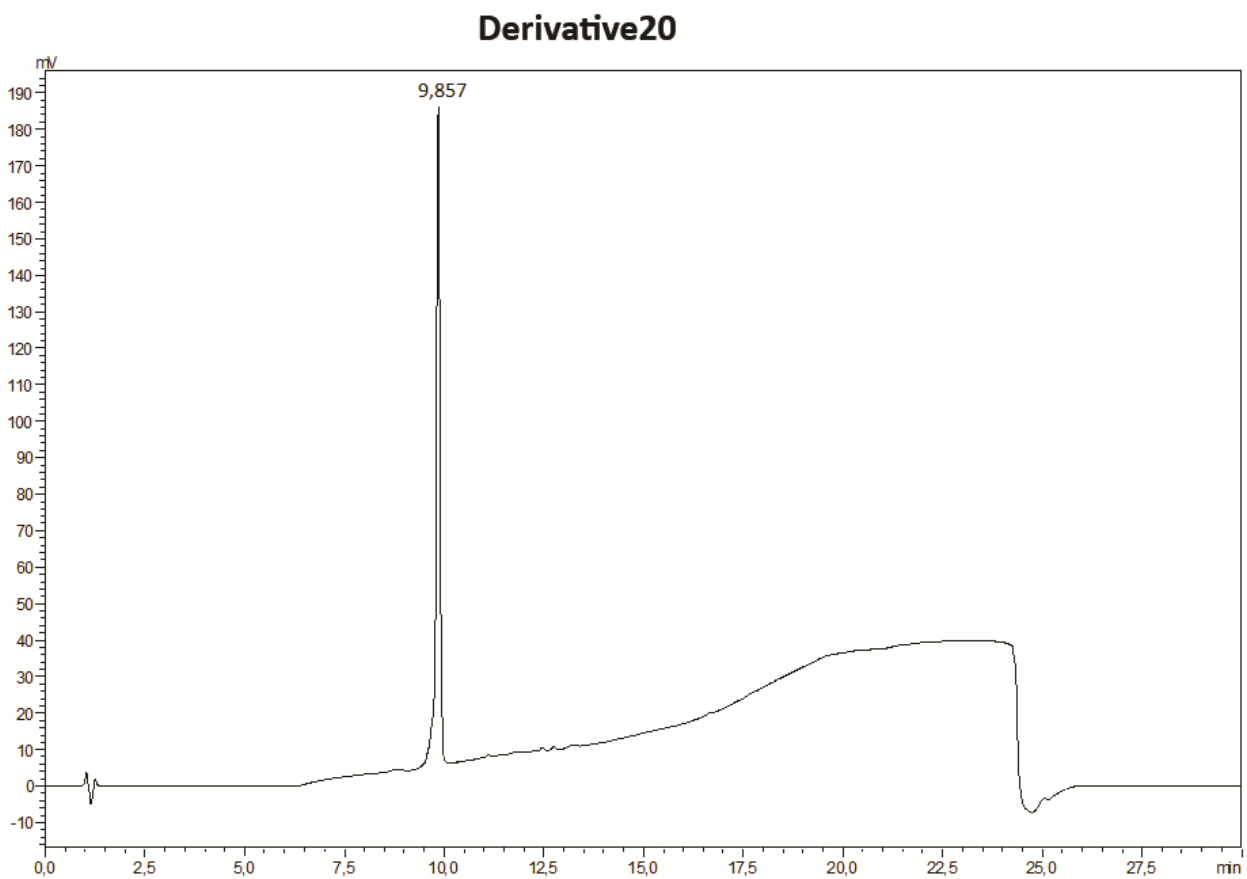

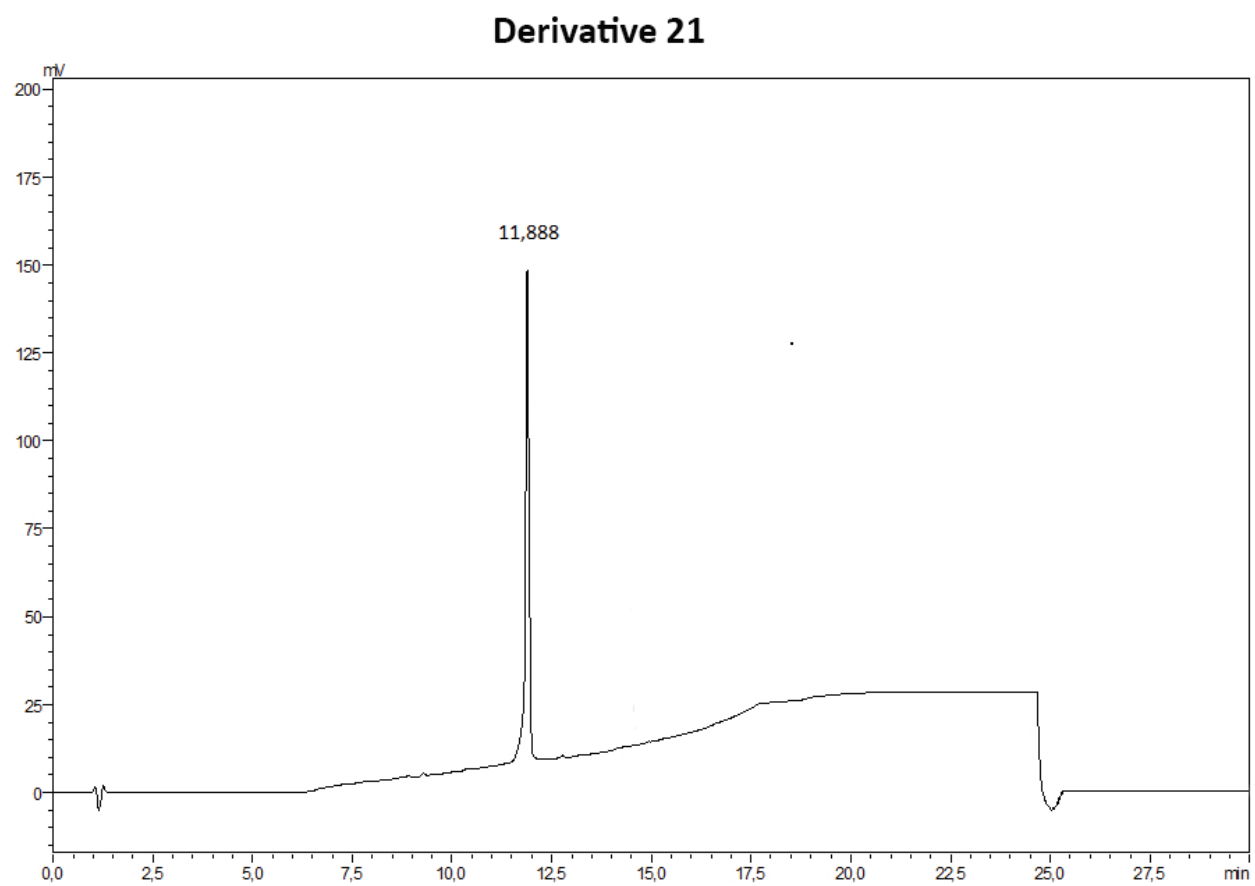

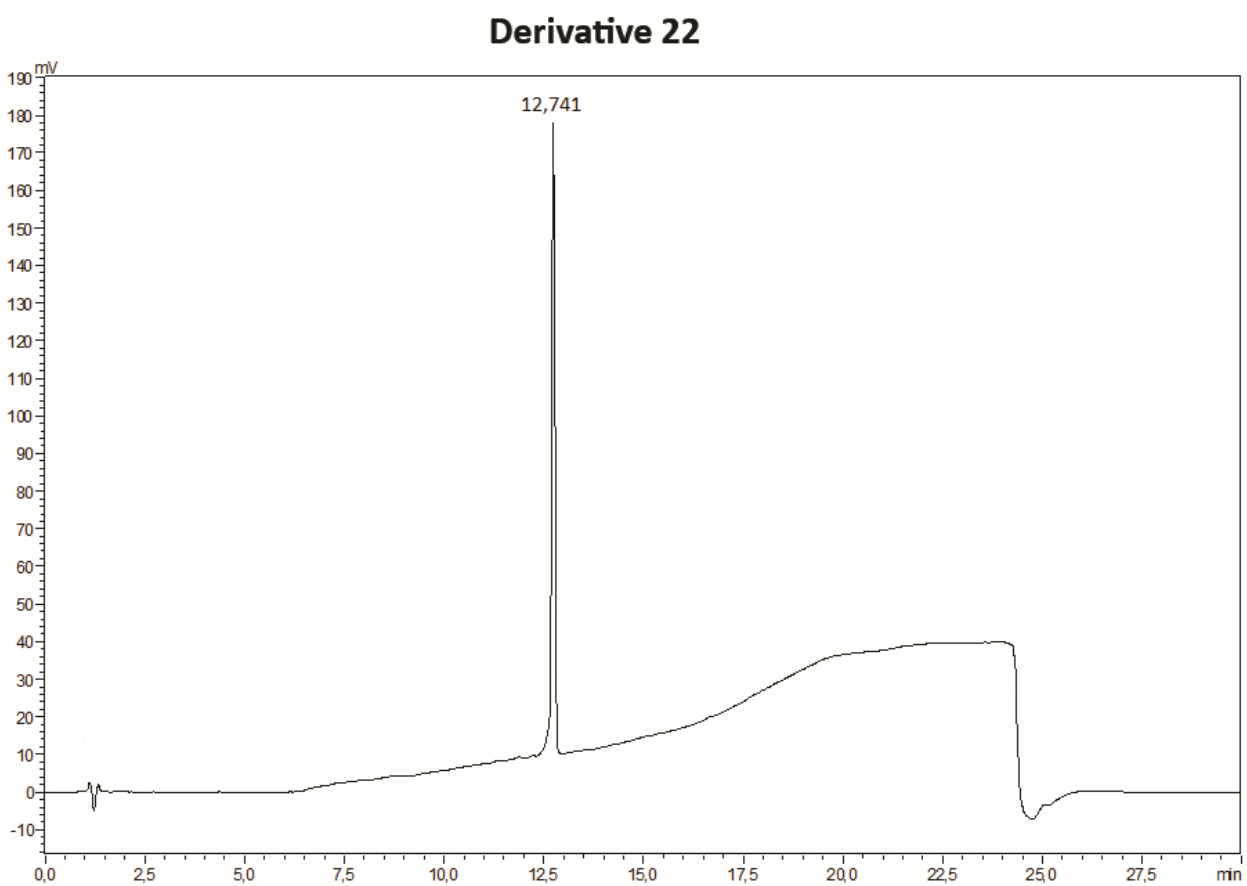

Supplement: Supplementary file 1 [file 3935695]
